# Supplementary material for: Guided Inferior Alveolar Nerve Lateralization and Simultaneous Implant Placement Using a Tooth-Supported Surgical Guide: A Case Report and Literature Review
Source: Research Square preprint supplement (doi:10.21203/rs.3.rs-7447762/v1), 2025-10-03
Supplement: Supplementary file 1 [file 56d86eb645678d27cba685d8.docx]

# Supplementary File

Search Strategies for Systematic Literature Review

This file details the exact database search formulas used in PubMed, Cochrane Library, Web of Science, and Scopus for identifying studies on computer-guided inferior alveolar nerve (IAN) lateralization, repositioning, or transposition with simultaneous dental implant placement. All searches were conducted up to July 2025.

## PubMed

(("inferior alveolar nerve"[Title/Abstract] OR IAN[Title/Abstract] OR "nerve lateralization"[Title/Abstract] OR "nerve repositioning"[Title/Abstract] OR "nerve transposition"[Title/Abstract]) AND ("dental implant"[Title/Abstract] OR "dental implants"[Title/Abstract] OR implantation[Title/Abstract]) AND ("computer-guided"[Title/Abstract] OR "guided surgery"[Title/Abstract] OR "surgical guide"[Title/Abstract] OR "digital planning"[Title/Abstract] OR "static guide"[Title/Abstract] OR "dynamic navigation"[Title/Abstract])) AND humans[MeSH Terms] AND English[lang] AND ("2010/01/01"[Date - Publication] : "2025/07/31"[Date - Publication])

## Cochrane Library

("inferior alveolar nerve" OR IAN OR "nerve lateralization" OR "nerve repositioning" OR "nerve transposition") AND ("dental implant*" OR implantation) AND ("computer-guided" OR "guided surgery" OR "surgical guide" OR "digital planning" OR "static guide" OR "dynamic navigation")

## Web of Science (WoS)

TS=("inferior alveolar nerve" OR "IAN" OR "nerve lateralization" OR "nerve repositioning" OR "nerve transposition") AND TS=("dental implant*" OR implantation) AND TS=("computer-guided" OR "guided surgery" OR "surgical guide" OR "digital planning" OR "static guide" OR "dynamic navigation")

Filters applied:
- Web of Science Categories: Dentistry, Oral Surgery & Medicine
- Document Types: Article, Review
- Timespan: 2010–2025
- Language: English

## Scopus

TITLE-ABS-KEY(("inferior alveolar nerve" OR "IAN" OR "nerve lateralization" OR "nerve repositioning" OR "nerve transposition") AND ("dental implant*" OR implantation) AND ("computer-guided" OR "guided surgery" OR "surgical guide" OR "digital planning" OR "static guide" OR "dynamic navigation")) AND (LIMIT-TO (DOCTYPE, "ar") OR LIMIT-TO (DOCTYPE, "re")) AND (LIMIT-TO (LANGUAGE, "English")) AND (PUBYEAR > 2009 AND PUBYEAR < 2026)
