# Supplementary material for: Guided Inferior Alveolar Nerve Lateralization and Simultaneous Implant Placement Using a Tooth-Supported Surgical Guide: A Case Report and Literature Review
Source: Research Square preprint supplement (doi:10.21203/rs.3.rs-7447762/v1), 2025-10-03
Supplement: Supplementary file 2 [file 7464cf332ee6435c46b22580.docx]

# Supplementary File 2

Inclusion and Exclusion Criteria for Systematic Literature Review

This file provides the inclusion and exclusion criteria applied in the systematic review of computer-guided inferior alveolar nerve (IAN) lateralization, repositioning, or transposition with simultaneous dental implant placement.

## Inclusion Criteria

- Human clinical studies with atrophic posterior mandible.
- Procedures: IAN lateralization, IAN transposition, or alveolar distraction osteogenesis with simultaneous dental implant placement.
- Must use computer-guided, digitally planned, or surgical guide–assisted techniques (static or dynamic).
- Reports clinical outcomes such as implant survival/success, nerve recovery, complications, or accuracy of placement.
- Study types: randomized controlled trials, cohort studies, case-control studies, case series (any size, including single case reports), and systematic reviews/meta-analyses.
- Language: English.

## Exclusion Criteria

- In vitro, cadaver, or animal studies.
- Freehand (non-guided) IAN procedures without digital assistance.
- Implant-only studies without nerve manipulation.
- Articles without original clinical data (letters, editorials, narrative reviews, or technical notes).
